# Supplementary material for: Differential Expression of In Vivo and In Vitro Protein Profile of Outer Membrane of Acidovorax avenae Subsp. avenae
Source: PLoS One. 2012 Nov 15;7(11):e49657. doi: 10.1371/journal.pone.0049657 (PMC3499465; doi:10.1371/journal.pone.0049657)
Supplement: Table S1 — List of in silico predicated and LC/MS identified in vitro outer membrane protiens of Acidovorax avenae subsp. avenae strain RS-1 proteome. (XLS) [file pone.0049657.s002.xls]

## Sheet: In vitro 
Table S1. List of in silicopredicated and LC/MS identified in vitro outer membrane protiens of Acidovorax avenae subsp. avenaestrain RS-1 proteome
Locus Tag	Protein name/Bacteria	Pfam funtional description	Size (A.A)	Theoretical Mass (DA)	No. of peptides	Search score	Detected by LC-MS/MS	GRAVY	COG
Aave_0155	unnamed protein product /Acidovorax citrulli AAC00-1	Outer membrane protein W	255	22937	3	230	Yes	0.08	3047
Aave_0387	transcriptional regulator, Fis family/Acidovorax avenae subsp. citrulli AAC00-1	Outer membrane efflux protein	385	42321	15	459	Yes	-0.1	1538
Aave_0538	hypothetical protein Aave_0538/Acidovorax avenae subsp. citrulli AAC00-1, complete genome.	A nuclease family of the HNH/ENDO VII superfamily	1335	143136	3	165	Yes	-0.73	Not found
Aave_0932	unnamed protein product/Acidovorax citrulli AAC00-1	Gram-negative porin	344	37143	12	182	Yes	-0.16	3203
Aave_0933	porin/Acidovorax citrulli AAC00-1	Gram-negative porin	374	40151	5	183	Yes	-0.301	3203
Aave_1330	17 kDa surface antigen/Acidovorax citrulli AAC00-1	Glycine zipper 2TM domain	185	19132	5	204	Yes	-0.32	Not found
Aave_1831	unnamed protein product/Acidovorax citrulli AAC00-1	protective antigen	765	81008	5	217	Yes	-0.38	4775
Aave_2271	porin/Acidovorax citrulli AAC00-1	Gram-negative porin	355	37049	3	272	Yes	-0.11	3203
Aave_2725	unnamed protein product /Acidovorax citrulli AAC00-1	Type II and III secretion system protein	566	62134	10	261	Yes	-0.101	1450
Aave_3140	unnamed protein product /Acidovorax citrulli AAC00-1						No
Aave_3269	TonB-dependent receptor /Acidovorax avenae subsp. citrulli AAC00-1						No
Aave_4150	general secretion pathway protein D/Acidovorax citrulli AAC00-1	Bacterial type II/III secretion system short domain	829	89134	8	381	Yes	0.01	1450
Aave_4344	Porin/Acidovorax citrulli AAC00-1	Gram-negative porin	340	34607	19	3589	Yes	-0.24	3203
Acav_0034	lipid A 3-O-deacylase-like protein/Acidovorax avenae subsp. avenae ATCC 19860						No
Acav_0050	outer membrane efflux protein /Acidovorax avenae subsp. avenae ATCC19860	Outer membrane efflux protein	461	54266	13	401	Yes	-0.36	1538
Acav_0228	TonB-dependent siderophore receptor/Acidovorax avenae subsp. avenae ATCC 19860	TonB-dependent Receptor Plug Domain	710	59626	12	182	Yes	-0.35	1629
Acav_0258	Aromatic hydrocarbon degradation membrane protein /Acidovorax avenae subsp. avenae ATCC 19860	Outer membrane transport protein	452	51626	3	165	Yes	0.05	2067
Acav_0287	hypothetical protein/Acidovorax avenae subsp. avenae ATCC 19860	Protein of unknown function	241	24312	4	98	Yes	-0.17	Not found
Acav_0368	mammalian cell entry related domain-containing protein/Acidovorax avenae subsp. avenae ATCC 19860	mammalian cell entry related protein	326	31665	2	82	Yes	-0.16	1463
Acav_0375	TonB-dependent siderophore receptor /Acidovorax avenae subsp. avenae ATCC 19860	Secretin and TonB N terminus short domain	801	146313	3	259	Yes	-0.31	1629
Acav_0391	NodT family RND efflux system OM lipoprotein/Acidovorax avenae subsp. avenae ATCC 19860						No
Acav_0458	NodT family RND efflux system OM lipoprotein/Acidovorax avenae subsp. avenae ATCC 19860						No
Acav_0853	methyl-accepting chemotaxis sensory transducer/Acidovorax avenae subsp. avenae ATCC 19860	Methyl-accepting chemotaxis protein (MCP) signalling domain	745	74549	2	231	Yes	-0.2	840
Acav_0869	general secretion pathway protein D/Acidovorax avenae subsp. avenae ATCC 19860	Bacterial type II/III secretion system short domain	804	112357	4	228	Yes	0.02	1450
Acav_0884	porin/Acidovorax avenae subsp. avenae ATCC 19860	Gram-negative porin	357	37416	20	560	Yes	-0.17	3203
Acav_0885	outer membrane porin protein /Acidovorax avenae subsp. avenae ATCC18860						No
Acav_0971	type IV pilus secretin PilQ /Acidovorax avenae subsp. avenae ATCC 19860						No
Acav_0988	toluene tolerance family protein/Acidovorax avenae subsp. avenae ATCC 19860	Toluene tolerance	218	21013	3	212	Yes	-0.18	2854
Acav_1013	hypothetical protein/Acidovorax avenae subsp. avenae ATCC 19860	Tetratricopeptide repeat	1336	91435	2	159	Yes	-0.46	457
Acav_1122	porin Gram-negative type/Acidovorax avenae subsp. avenae ATCC 19860	Gram-negative porin	341	37154	3	346	Yes	-0.19	3203
Acav_1407	TonB-dependent siderophore receptor/Acidovorax avenae subsp. avenae ATCC 19860	TonB-dependent Receptor Plug Domain	724	132123	3	125	Yes	-0.31	1629
Acav_1455	peptidase M23/Acidovorax avenae subsp. avenae ATCC 19860	Peptidase family M23	299	23175	9	473	Yes	-0.13	739
Acav_1466	outer membrane assembly lipoprotein YfgL/Acidovorax avenae subsp. avenae ATCC 19860	PQQ-like domain	385	34121	11	461	Yes	-0.01	1520
Acav_1577	TonB-dependent receptor /Acidovorax avenae subsp. avenae ATCC19860	TonB-dependent Receptor Plug Domain	653	71034	9	318	Yes	-0.32	1629
Acav_1748	outer membrane efflux protein /Acidovorax avenae subsp. avenae ATCC9860	Outer membrane efflux protein	495	50091	14	250	Yes	-0.18	1538
Acav_1826	peptidoglycan-associated lipoprotein /Acidovorax avenae subsp. avenae ATCC 19860	OmpA family	181	11230	10	229	Yes	-0.36	2885
Acav_1884	NodT family RND efflux system outer membrane lipoprotein	Outer membrane efflux protein	507	54682	8	215	Yes	0.04	1538
Acav_1928	TonB-dependent receptor/Acidovorax avenae subsp. avenae ATCC19860	TonB-dependent Receptor Plug Domain	737	141021	8	204	Yes	-0.22	1629
Acav_2007	outer membrane assembly lipoprotein YfiO/Acidovorax avenae subsp. avenae ATCC 19860	Outer membrane lipoprotein	265	21516	2	114	Yes	-0.47	457
Acav_2189	OmpW family protein/Acidovorax avenae subsp. avenae ATCC 19860	Outer membrane protein W	200	111873	3	199	Yes	0.12	3047
Acav_2282	TonB-dependent siderophore receptor/Acidovorax avenae subsp. avenae ATCC 19860	TonB-dependent Receptor Plug Domain	793	142013	8	198	Yes	-0.33	1629
Acav_2290	TonB-dependent siderophore receptor/Acidovorax avenae subsp. avenae ATCC 19860	Secretin and TonB N terminus short domain	733	87648	5	116	Yes	-0.31	1629
Acav_2307	hypothetical protein/Acidovorax avenae subsp. avenae ATCC 19860	Domain of Unknown Function (DUF748)	1314	212061	5	312	Yes	-0.14	Not found
Acav_2339	autotransporter-associated beta strand repeat-containing protein/Acidovorax avenae subsp. avenae ATCC 19860						No
Acav_2345	PpiC-type peptidyl-prolyl cis-trans isomerase/Acidovorax avenae subsp. avenae ATCC 19860						No
Acav_2436	TolC family type I secretion OM protein/Acidovorax avenae subsp. avenae ATCC 19860						No
Acav_2447	TonB-dependent receptor/Acidovorax avenae subsp. avenae ATCC 19860	TonB-dependent Receptor Plug Domain	715	121023	8	210	Yes	-0.24	1629
Acav_2488	porin Gram-negative type /Acidovorax avenae subsp. avenae ATCC 19860	Gram-negative porin	370	42130	7	258	Yes	-0.12	3203
Acav_2514	hypothetical protein Acav_2514/Acidovorax avenae subsp. avenae ATCC19860	TPR-repeat-containing proteins	1061	121832	8	187	Yes	-0.37	457
Acav_2605	TonB-dependent receptor/Acidovorax avenae subsp. avenae ATCC19860	TonB-dependent Receptor Plug Domain	723	85028	4	189	Yes	-0.26	1629
Acav_2714	NodT family RND efflux system outer membrane lipoprotein/Acidovorax avenae subsp. avenae ATCC 19860						No
Acav_2872	porin Gram-negative type/Acidovorax avenae subsp. avenae ATCC 19860	Gram-negative porin	355	37140	3	117	Yes	-0.15	3203
Acav_3041	NodT family RND efflux system outer membrane lipoprotein/Acidovorax avenae subsp. avenae ATCC 19860	Outer membrane efflux protein	524	37187	2	90	Yes	-0.08	1538
Acav_3110	RHS repeat-associated core domain-containing protein /Acidovorax avenae subsp. avenae ATCC 19860	RHS Repeat	1732	23786	4	107	Yes	-0.43	3209
Acav_3117	NodT family RND efflux system outer membrane lipoprotein/Acidovorax avenae subsp. avenae ATCC 19860	Outer membrane efflux protein	489	48221	2	114	Yes	-0.011	1538
Acav_3241	peptidase M75, Imelysin/Acidovorax avenae subsp. avenae ATCC19860						No
Acav_3281	OmpA domain-containing protein/Acidovorax avenae subsp. avenae ATCC 19860	Outer membrane protein W	200	26325	3	199	Yes	-0.27	Not found
Acav_3290	outer membrane lipoprotein carrier protein/Acidovorax avenae subsp. avenae ATCC 19860	Outer membrane lipoprotein carrier protein LolA	211	23113	2	71	Yes	-0.27	2834
Acav_3316	TonB-dependent siderophore receptor/Acidovorax avenae subsp. avenae ATCC 19860	TonB-dependent Receptor Plug Domain	693	112134	3	79	Yes	-0.25	1629
Acav_3451	methyl-accepting chemotaxis sensory transducer/Acidovorax avenae subsp. avenae ATCC 19860						No
Acav_3605	peptidase M23/Acidovorax avenae subsp. avenae ATCC 19860						No
Acav_3645	TonB-dependent siderophore receptor/Acidovorax avenae subsp. avenae ATCC 19860	Fe transport	733	89309	3	105	Yes	-0.39	1629
Acav_3659	porin/Acidovorax avenae subsp. avenae ATCC 19860	Gram-negative porin	362	41901	4	170	Yes	0.03	3203
Acav_3681	family 3 extracellular solute-binding protein/Acidovorax avenaes subsp. avenae ATCC 19860	Bacterial extracellular solute-binding proteins, family 3	300	72549	2		Yes	0.039	834
Acav_3690	hypothetical protein/Acidovorax avenae subsp. avenae ATCC 19860	Phosphate-selective porin O and P	411	38799	2	72	Yes	-0.23	3203
Acav_3853	surface antigen (D15)/Acidovorax avenae subsp. avenae ATCC 19860	Surface antigen	629	78829	2	65	Yes	-0.42	729
Acav_3854	hypothetical protein/Acidovorax avenae subsp. avenae ATCC 19860	Family of unknown function (DUF490)	1471	159134	7	129	Yes	-0.17	2991
Acav_3903	TonB-dependent siderophore receptor/Acidovorax avenae subsp. avenae ATCC 19860	TonB-dependent Receptor Plug Domain	723	121543	5	98	Yes	-0.33	1629
Acav_3935	porin Gram-negative type/Acidovorax avenae subsp. avenae ATCC 19860	Gram-negative porin	343	38898	4	346	Yes	-0.23	3203
Acav_3962	peptidase M23 /Acidovorax avenae subsp. avenae ATCC 19860	Peptidase family M23	462	43011	3	77	Yes	-0.24	739
Acav_4020	general secretion pathway protein D/Acidovorax avenae subsp. avenae ATCC 19860	Bacterial type II/III secretion system short domain	823	132123	2	86	Yes	0.004	1450
Acav_4138	porin Gram-negative type /Acidovorax avenae subsp. avenae ATCC19860	Gram-negative porin	358	34250	3	103	Yes	-0.06	3203
Acav_4225	NodT family RND efflux system outer membrane lipoprotein/Acidovorax avenae subsp. avenae ATCC 19860						No
Acav_4243	porin Gram-negative type/Acidovorax avenae subsp. avenae ATCC 19860	Gram-negative porin	336	35942	14	914	Yes	-0.33	3203
Acav_4321	flagellar L-ring protein /Acidovorax avenae subsp. avenae ATCC19860	Flagellar L-ring protein	251	27322	2	90	Yes	0.09	2063
Acav_4372	phospholipase A(1)/Acidovorax avenae subsp. avenae ATCC 19860	Phospholipase A1	417	42024	3	101	Yes	-0.43	2829
Acav_4474	SmpA/OmlA domain-containing protein/Acidovorax avenae subsp. avenae ATCC 19860						No
Acav_4486	OmpW family protein/Acidovorax avenae subsp. avenae ATCC 19860						No
Acav_4531	fimbrial biogenesis outer membrane usher protein/Acidovorax avenae subsp. avenae ATCC 19860						No
Acav_4587	MltA domain-containing protein/Acidovorax avenae subsp. avenae ATCC 19860						No
Acav_4592	hypothetical protein/Acidovorax avenae subsp. avenae ATCC 19860						No
Acav_4598	NodT family RND efflux system outer membrane lipoprotein/Acidovorax avenae subsp. avenae ATCC 19860						No
Acav_4753	LPS-assembly protein lptD/Acidovorax avenae subsp. avenae ATCC 19860						No
AcdelDRAFT_0654	porin/Acidovorax sp.	Gram-negative porin	339		3	180	Yes	-0.08	3203
I1SXW0	Major OM lipoprotein /Pseudomonas oleovorans		83	8843	1	102	Yes	Not found	Not found
	Lipoproteins and other probable OMPs identified by LC/MS but not predicted as OMPs by PsortB
Aave_0372	unnamed protein product /Acidovorax citrulli AAC00-1	ATP synthase alpha/beta family	476	48192	2	250	Yes	-0.08	55
Aave_1431	unnamed protein product /Acidovorax citrulli AAC00-1	SPFH domain/Band 7 family	299	33946	6	174	Yes	330	330
Aave_1432	HflC protein/Acidovorax citrulli AAC00-1	SPFH domain / Band 7 family	299	33946	4	156	Yes	-0.39	330
Aave_1519	unnamed protein product /Acidovorax citrulli AAC00-1	Universal stress protien	148	12310	2	150	Yes	0.01	589
Aave_2626	phosphate ABC transporter periplasmic pbp/Acidovorax citrulli AAC00-1	phosphate binding protien domain	346	36701	5	80	Yes	-0.13	226
Aave_3046	Sulphate ABC transporter periplasmic sulfate-binding protein	Extracellular solute-binding protein	341	38210	2	173	Yes	-0.34	1613
Aave_4055	Unnamed protien/Acidovorax citrulli AAC00-1		299	32609	2	82	Yes	-0.15	2961
Aave_4073	extracellular solute-binding protein/Acidovorax citrulli AAC00-1	Extracellular solute-binding proteins	300	32517	2	85	Yes	-0.28	834
Aave_4401	flagellin domain-containing protein/Acidovorax citrulli AAC00-1		492	49295	27	4642	Yes	-0.041	1344
Aave_4402	flagellin or unamed protien/Acidovorax citrulli AAC00-1		492	49332	5	360	Yes	-0.07	1344
Acav_0086	peptidoglycan-binding domain 1 protein	Putative peptidoglycan binding domain	346	39221	3	138	Yes	-0.17	3409
Acav_0441	ATP synthase F1 subunit gamma/Acidovorax avenae subsp. avenae ATCC19860	ATP synthase	288	25213	2	68	Yes	-0.189	224
Acav_1299	monosaccharide-transporting ATPase/Acidovorax avenae subsp. avenae ATCC 19860		257	223101	5	116	Yes	0.12	411
Acav_1300	ABC transporter related protein/Acidovorax avenae subsp. avenae ATCC 19860	ABC transporter	236	25744	4	235	Yes	0.053	410
Acav_1946	phasin family protein/Acidovorax avenae subsp. avenae ATCC 19860	Phasin protein	192	13221	2	92	Yes	-0.09	Not found
Acav_2235	sulfate ABC transporter, periplasmic sulfate-binding protein/Acidovorax avenae subsp. avenae ATCC 19860	extracellular solute-binding protein	340	39112	2	61	Yes	-0.31	1613
Acav_2355	ABC transporter related protein/Acidovorax avenae subsp. avenae ATCC 19860	ABC transporter	231	29946	10	260	Yes	-0.18	410
Acav_2385	phenylalanyl-tRNA synthetase subunit beta/Acidovorax avenae subsp. avenae ATCC 19860	Putative tRNA binding domain	812	89187	2	94	Yes	-0.09	72
Acav_2494	ABC transporter related protein/Acidovorax avenae subsp. avenae ATCC 19860	Oligopeptide/dipeptide transporter	540	58573	3	171	Yes	0.009	410
Acav_2565	transcription terminati fact Rho/Acidovorax sp.	Rho termination factor, N-terminal domain	420	47404.8	2	114	Yes	-0.34	1158
Acav_2662	sulfate ABC transporter periplasmic sulfate-binding protein/Acidovorax avenae subsp. avenae ATCC 19860	Bacterial extracellular solute-binding protein	337	37351	5	105	Yes	-0.26	1613
Acav_3005	putative lipoprotein/Acidovorax avenae subsp. avenae ATCC 19860	Lipase (class 3)	495	51192	2	88	Yes	-0.19	Not found
Acav_4216	LysR family transcriptional regulator/Acidovorax avenae subsp. avenae ATCC 19860	Bacterial regulatory helix-turn-helix protein, lysR famil	305	34123	5	103	Yes	0.004	583
Acav_4270	ABC transporter related protein/Acidovorax avenae subsp. avenae ATCC 19860	ABC transporter	629	76608	3	82	Yes	-0.24	488
Acav_4296	flagellin domain-containing protein/Acidovorax avenae subsp. avenae ATCC 19860	Bacterial flagellin N-terminal helical region	492	49263	16	2533	Yes	-0.09	1344
Acav_4373	Hypothetical protiens/Acidovorax avenae subsp. avenae ATCC 19860		417	42192	3	101	Yes	-0.43	2829
AcdelDRAFT_3780	ABC transporter-like protein/Acidovorax delafieldii 2AN	ABC transporter	256		2	64	Yes	0.12	1131
Ajs_0465	ABC transporter-like protein/Acidovorax sp. JS42	ABC transporter	269	15646	2	65	Yes	-0.2	410
Ajs_0888	ABC transporter related/Acidovorax sp. JS42	ABC transporter	285	51116	3	77	Yes	-0.2	1123
Ajs_2082	patatin/Acidovorax sp. JS42	Patatin-like phospholipase	322	34388	2	114	Yes	0.13	1752
PFLU1139	ABC transporter periplasmic bp/Pseudomonas fluorescens SBW25	Bacterial extracellular solute-binding proteins, family 3	308	33527	2	62	Yes	-0.25	834
PFLU6048	putative phosphate ABC trans/Pseudomonas fluorescens SBW25	PBP superfamily domain	328	34713	3	63	Yes	-0.08	226
PFWH6_3043	phosphate ABC transporter, periplasmic protiens/Pseudomonas fluorescens WH6	PBP superfamily domain	342	36557	4	79	Yes	-0.1	226
XAC1975	flagellin/Xanthomonas axonopodis pv. citri str. 306	Bacterial flagellin N-terminal helical region	399	40856	3	129	Yes	-0.1	1344
