# Supplementary material for: Differential Expression of In Vivo and In Vitro Protein Profile of Outer Membrane of Acidovorax avenae Subsp. avenae
Source: PLoS One. 2012 Nov 15;7(11):e49657. doi: 10.1371/journal.pone.0049657 (PMC3499465; doi:10.1371/journal.pone.0049657)
Supplement: Table S2 — List of in silico predicted and LC/MS identified in vivo outer membrane protiens of Acidovorax avenae subsp. avenae strain RS-1 proteome. (XLS) [file pone.0049657.s003.xls]

## Sheet: In vivo
Table S2. List of in silicopredicted and LC/MS identified in vivo outer membrane protiens of Acidovorax avenae subsp. avenae strain RS-1 proteome
Locus Tag	Protein name or predicted funtion/Bacterial species	Predicted function and family	Size (A.A)	Theoretical Mass (DA)	No. of peptides	Search score	GRAVY	COG
Aave_0372	unnamed protein product /Acidovorax citrulli AAC00-1	ATP synthase alpha/beta family	476	48192	2	77	-0.08	55
Aave_0387	transcriptional regulator, Fis family/Acidovorax avenae subsp. citrulli AAC00-1	Outer membrane efflux protein	385	42321	2	91	-0.1	1538
Aave_1831	unnamed protein product/Acidovorax citrulli AAC00-1	Surface antigen variable number repeat	765	81008	3	201	-0.38	729
Aave_2271	porin/Acidovorax citrulli AAC00-1	Gram-negative porin	355	37049	19	2224	-0.11	3203
Aave_4344	porin /Acidovorax citrulli AAC00-1	Gram-negative porin	340	36457	12	643	-0.24	3203
Aave_4402	flagellin or unamed protien/Acidovorax citrulli AAC00-1	Bacterial flagellin N-terminal helical region	492	49332	5	360	Yes	-0.07	1344
Acav_0050	outer membrane efflux protein/Acidovorax avenae subsp. avenae ATCC19860	Outer membrane efflux protein	461	54266	2	201	-0.36	1538
Acav_0287	hypothetical protein/Acidovorax avenae subsp. avenae	Bacterial protein of unknown function	241	24312	4	122	-0.17	Not found
Acav_0368	mammalian cell entry related domain-containing protein/Acidovorax avenae subsp. avenae ATCC 19860	mce related protein	326	31665	3	107	-0.16	1463
Acav_0496	OmpA/MotB domain-containing protein/Acidovorax avenae subsp. avenae ATCC 19860	OmpA family	379	39416	6	174	-0.19	2885
Acav_0812	TonB-dependent receptor/Acidovorax avenae subsp. avenae ATCC9860	Secretin and TonB N terminus short domain	836	17648	2	107	-0.31	1629
Acav_0869	general secretion pathway protein D/Acidovorax avenae subsp. avenae ATCC 19860	Bacterial type II/III secretion system short domain	804	112357	5	214	0.02	1450
Acav_0884	porin/Acidovorax avenae subsp. avenae ATCC 19860	Gram-negative porin	357	37416	8	335	-0.18	3203
Acav_0988	toluene tolerance family protein/Acidovorax avenae subsp. avenae ATCC 19860	Toluene tolerance, Ttg2	218	21013	3	92	-0.18	2854
Acav_1013	hypothetical protein Acav1013/Acidovorax avenae subsp. avenae ATCC 19860	Tetratricopeptide repeat	1336	91435	4	84	-0.46	457
Acav_1466	OM assembly lipoprotein YfgL/Acidovorax avenae subsp. avenae ATCC 19860	PQQ-like domain	385	34121	3	63	-0.01	1520
Acav_1577	TonB-dependent receptor/Acidovorax avenae subsp. avenae ATCC19860	TonB-dependent Receptor Plug Domain	653	69393	3	96	-0.32	1629
Acav_1748	outer membrane efflux protein/Acidovorax avenae subsp. avenae ATCC9860	Outer membrane efflux protein	495	50091	2	112	-0.18	No
Acav_1826	peptidoglycan-associated lipoprotein/Acidovorax avenae subsp. avenae ATCC 19860	OmpA family	181	11230	3	132	-0.36	2885
Acav_1884	NodT family RND efflux system outer membrane lipoprotein/Acidovorax avenae subsp. avenae ATCC 19860	Outer membrane efflux protein	507	54682	2	152	0.04	1538
Acav_2007	OM assembly lipoprotein YfiO/Acidovorax avenae subsp. avenae ATCC 19860	Outer membrane lipoprotein	265	21516	2	159	-0.47	457
Acav_2189	OmpW family protein/Acidovorax avenae subsp. avenae ATCC 19860	OmpW family	200	111873	4	107	0.12	3047
Acav_2290	TonB-dependent siderophore receptor/Acidovorax avenae subsp. avenae ATCC 19860	TonB-dependent Receptor Plug Domain	661	86180	2	103	-0.26	1629
Acav_2307	hypothetical protein Acav_2307/Acidovorax avenae subsp. avenae ATCC 19860	Domain of Unknown Function	1314	212061	2	172	-0.14	Not found
Acav_2488	porin Gram-negative type /Acidovorax avenae subsp. avenae ATCC 19860	Gram-negative porin	370	33162	6	225	-0.12	3203
Acav_2565	transcription terminati fact Rho/Acidovorax sp.	Rho termination factor, N-terminal domain	420	47404.8	2	114	Yes	-0.34	1158
Acav_2605	TonB-dependent receptor/Acidovorax avenae subsp. avenae ATCC19860	TonB-dependent Receptor Plug Domain	723	85028	2	94	-0.26	1629
Acav_2872	porin Gram-negative type/Acidovorax avenae subsp. avenae ATCC 19860	Gram-negative porin	355	37140	4	173	-0.15	3203
Acav_3041	NodT family OM lipoprotein/Acidovorax avenae subsp. avenae ATCC 19860	Outer membrane efflux protein	524	37187	6	83	-0.08	1538
Acav_3117	NodT family of OM lipoprotein/Acidovorax avenae subsp. avenae ATCC 19860	Outer membrane efflux protein	489	51293	3	96	-0.01	1538
Acav_3316	TonB-dependent siderophore receptor/Acidovorax avenae subsp. avenae ATCC 19860	TonB-dependent Receptor Plug Domain	693	76154	4	115	-0.25	1629
Acav_3645	TonB-dependent siderophore receptor/Acidovorax avenae subsp.avenae ATCC 19860	TonB-dependent Receptor Plug Domain	733	89309	2	105	-0.39	1629
Acav_3659	porin/Acidovorax avenae subsp. avenae ATCC 19860	Gram-negative porin	362	41901	3	146	0.03	436
Acav_3681	Eextracellular solute-binding protein/Acidovorax avenaes subsp. avenae ATCC 19860]	Bacterial extracellular solute-binding proteins,	300	72549	4	290	0.03	834
Acav_3690	hypothetical protein Acav_3690/Acidovorax avenae subsp. avenae ATCC 19860	Phosphate-selective porin O and P	411	38799	3	84	-0.23	3203
Acav_3853	surface antigen (D15)/Acidovorax avenae subsp. avenae ATCC 19860	Surface antigen	629	78829	3	125	-0.42	729
Acav_3880	General secretion pathway protein F	Type II secretion system (T2SS), protein F	411	49293	4	225	0.5	1459
Acav_3903	TonB-dependent siderophore receptor/Acidovorax avenae subsp. avenae ATCC 19860	TonB-dependent Receptor Plug Domain	723	79357	1	116	-0.33	1629
Acav_3935	porin Gram-negative type/Acidovorax avenae subsp. avenae ATCC 19860	Gram-negative porin	343	38898	3	111	-0.23	3203
Acav_4020	general secretion pathway protein D /Acidovorax avenae subsp. avenae ATCC 19860	Bacterial type II/III secretion system short domain	823	121322	4	231	0	1450
Acav_4244	Porin Gram-negative type/Acidovorax avenae subsp. avenae ATCC 19860	Gram-negative porin	336	35942	5	113	-0.33	3203
Acav_4321	flagellar L-ring protein/Acidovorax avenae subsp. avenae ATCC19860	Flagellar L-ring protein	251	27322	4	321	0.09	2063
Ajs_0465	ABC transporter-like protein/Acidovorax sp. JS42	ABC transporter	269	15646	2	65	-0.2	410
Ajs_0682	porin Gram-negative type/Acidovorax sp. JS42	Gram-negative porin	362	37143	4	98	-0.12	3203
I1SXW0	Major OM lipoprotein /Pseudomonas oleovorans		83	8843	1	102	-0.45	Not found
	Lipoproteins and other probable OMPs predicted by LC/MS but not predicted as OMPs by PsortB
Aave_1431	unnamed protein product /Acidovorax citrulli AAC00-1	SPFH domain/Band 7 family	299	33946	6	174	-0.39	Not found
Aave_1432	unnamed protein product /Acidovorax citrulli AAC00-1	Putative modulator of DNA gyrase	485	51348	4	87	-0.2	312
Aave_2079	Sulphate ABC transporter periplasmic sulfate-binding protein/Acidovorax citrulli AAC00-1	Bacterial extracellular solute-binding protein	341	38210	5	84	-0.34	1613
Aaav_3310	BFD binding domain containing prottein/Acidovorax citrulli AAC00-1		91	9693	2	123	-0.042	Not found
Aave_3309	flagellin domain-containing protein/Acidovorax citrulli AAC00-1	Bacterial flagellin N-terminal helical region	492	49394	2	70	-0.07	1344
Aave_4400	phasin family protein/Acidovorax avenae subsp. avenae ATCC 19860	Phasin protein	192	20047	4	87	-0.09	Not found
Acav_1300	ABC transporter related protein/Acidovorax avenae subsp. avenae ATCC 19860	ABC transporter	236	25744	4	235	Yes	0.053	410
Acav_1946	phasin family protein/Acidovorax avenae subsp. avenae ATCC 19860	Clp amino terminal domain	782	86167	2	91	-0.25	542
Acav_2010	ATP-dependent Clp protease/A. avenae subsp. avenae ATCC 19860	extracellular solute-binding protein	340	39112	3	142	-0.31	1613
Acav_2235	ABC transporter related protein/Acidovorax avenae subsp. avenae ATCC 19860	ABC transporter	231	29946	4	140	-0.18	410
Acav_2355	flagellar hook-associated 2 domain-containing protein/Acidovorax avenae subsp. avenae ATCC 19860	Flagellar capping protein	478	48675	2	92	-0.07	1345
Acav_4296	ABC transporter related protein/Acidovorax avenae subsp. avenae ATCC 19860	ABC transporter	629	76608	3	221	-0.24	488
Acav_4270	flagellin domain-containing protein/Acidovorax citrulli AAC00-1	Bacterial flagellin N-terminal helical region	492	52527	20	1754	-0.47	1344
Acav_4297	flagellin domain-containing protein/Acidovorax avenae subsp. avenae ATCC 19860	Bacterial flagellin N-terminal helical region	492	49329	24	1936	-0.06	1344
Acav_4298	Phosphate ABC transporter PBP/ Acidovorax avenae subsp. avenae ATCC19860	PBP superfamily domain	343	36424	8	228	0.17	226
AcdelDRAFT_1224	Phosphate ABC transporter PBP/Acidovorax delafieldii 2AN	ABC transporter	364	38506	3	123	-0.104	Not found
	Major OM lipoprotein /Pseudomonas oleovorans
