# Supplementary material for: Differential Expression of In Vivo and In Vitro Protein Profile of Outer Membrane of Acidovorax avenae Subsp. avenae
Source: PLoS One. 2012 Nov 15;7(11):e49657. doi: 10.1371/journal.pone.0049657 (PMC3499465; doi:10.1371/journal.pone.0049657)
Supplement: Table S4 — List of LC-MS/MS identified unique outer membrane proteins under in vitro condition of Acidovorax avenae subsp. avenae strain RS-1 proteome. (XLS) [file pone.0049657.s005.xls]

## Sheet: Unique Protiens
Table S4. List of in silicopredicated and LC/MS identified unique in vitro outer membrane protiens of Acidovorax avenae subsp. avenaestrain RS-1 proteome
Locus Tag	Protein name/Bacteria
Aave_0155	unnamed protein product /Acidovorax citrulli AAC00-1
Aave_0538	hypothetical protein Aave_0538/Acidovorax avenae subsp. citrulli AAC00-1, complete genome.
Aave_0932	unnamed protein product/Acidovorax citrulli AAC00-1
Aave_0933	porin/Acidovorax citrulli AAC00-1
Aave_1330	17 kDa surface antigen/Acidovorax citrulli AAC00-1
Aave_1519	unnamed protein product /Acidovorax citrulli AAC00-1
Aave_2626	phosphate ABC transporter periplasmic pbp/Acidovorax citrulli AAC00-1
Aave_2725	unnamed protein product /Acidovorax citrulli AAC00-1
Aave_3046	Sulphate ABC transporter periplasmic sulfate-binding protein
Aave_4055	Unnamed protien/Acidovorax citrulli AAC00-1
Aave_4073	extracellular solute-binding protein/Acidovorax citrulli AAC00-1
Aave_4150	general secretion pathway protein D/Acidovorax citrulli AAC00-1
Aave_4401	flagellin domain-containing protein/Acidovorax citrulli AAC00-1
Acav_0050	outer membrane efflux protein /Acidovorax avenae subsp. avenae ATCC19860
Acav_0086	peptidoglycan-binding domain 1 protein
Acav_0228	TonB-dependent siderophore receptor/Acidovorax avenae subsp. avenae ATCC 19860
Acav_0258	Aromatic hydrocarbon degradation membrane protein /Acidovorax avenae subsp. avenae ATCC 19860
Acav_0375	TonB-dependent siderophore receptor /Acidovorax avenae subsp. avenae ATCC 19860
Acav_0441	ATP synthase F1 subunit gamma/Acidovorax avenae subsp. avenae ATCC19860
Acav_0853	methyl-accepting chemotaxis sensory transducer/Acidovorax avenae subsp. avenae ATCC 19860
Acav_1122	porin Gram-negative type/Acidovorax avenae subsp. avenae ATCC 19860
Acav_1299	monosaccharide-transporting ATPase/Acidovorax avenae subsp. avenae ATCC 19860
Acav_1407	TonB-dependent siderophore receptor/Acidovorax avenae subsp. avenae ATCC 19860
Acav_1455	peptidase M23/Acidovorax avenae subsp. avenae ATCC 19860
Acav_1884	NodT family RND efflux system outer membrane lipoprotein
Acav_1928	TonB-dependent receptor/Acidovorax avenae subsp. avenae ATCC19860
Acav_2282	TonB-dependent siderophore receptor/Acidovorax avenae subsp. avenae ATCC 19860
Acav_2385	phenylalanyl-tRNA synthetase subunit beta/Acidovorax avenae subsp. avenae ATCC 19860
Acav_2447	TonB-dependent receptor/Acidovorax avenae subsp. avenae ATCC 19860
Acav_2514	hypothetical protein Acav_2514/Acidovorax avenae subsp. avenae ATCC19860
Acav_2662	sulfate ABC transporter periplasmic sulfate-binding protein/Acidovorax avenae subsp. avenae ATCC 19860
Acav_3005	putative lipoprotein/Acidovorax avenae subsp. avenae ATCC 19860
Acav_3110	RHS repeat-associated core domain-containing protein /Acidovorax avenae subsp. avenae ATCC 19860
Acav_3281	OmpA domain-containing protein/Acidovorax avenae subsp. avenae ATCC 19860
Acav_3290	outer membrane lipoprotein carrier protein/Acidovorax avenae subsp. avenae ATCC 19860
Acav_3854	hypothetical protein/Acidovorax avenae subsp. avenae ATCC 19860
Acav_3962	peptidase M23 /Acidovorax avenae subsp. avenae ATCC 19860
Acav_4138	porin Gram-negative type /Acidovorax avenae subsp. avenae ATCC19860
Acav_4216	LysR family transcriptional regulator/Acidovorax avenae subsp. avenae ATCC 19860
Acav_4243	porin Gram-negative type/Acidovorax avenae subsp. avenae ATCC 19860
Acav_4372	phospholipase A(1)/Acidovorax avenae subsp. avenae ATCC 19860
AcdelDRAFT_0654	porin/Acidovorax sp.
AcdelDRAFT_3780	ABC transporter-like protein/Acidovorax delafieldii 2AN
Ajs_0888	ABC transporter related/Acidovorax sp. JS42
Ajs_2082	patatin/Acidovorax sp. JS42
PFLU1139	ABC transporter periplasmic bp/Pseudomonas fluorescens SBW25
PFLU6048	putative phosphate ABC trans/Pseudomonas fluorescens SBW25
PFWH6_3043	phosphate ABC transporter, periplasmic protiens/Pseudomonas fluorescens WH6
XAC1975	flagellin/Xanthomonas axonopodis pv. citri str. 306
